# Supplementary material for: Defining Disadvantaged Places: Social Burdens of Wildfire Exposure in the Eastern United States, 2000–2020
Source: MDPI journal article supplement (doi:10.3390/fire7040124), 2024-04-08
Supplement: s1 [file fire-2904505-supplementary.pdf › fire-2904505-supplementary.pdf]

**Table S1: SoVI Variables**

All variables are calculated from the 2020 American Community Survey 5-year averages.

| <b>Variable Name</b> | <b>Variable Description</b>                                                    |
|----------------------|--------------------------------------------------------------------------------|
| QAGEDEP              | Percent Population under 5 years or 65 and over                                |
| QASIAN               | Percent Asian                                                                  |
| QBLACK               | Percent Black                                                                  |
| QCVLUN               | Percent Civilian Unemployment                                                  |
| QDISABLE             | Percent of population with a disability                                        |
| QED12LES             | Percent with Less than 12th Grade Education                                    |
| QESL                 | Percent Speaking English as a Second Language with Limited English Proficiency |
| QEXTRCT              | Percent Employment in Extractive Industries                                    |
| QFEMALE              | Percent Female                                                                 |
| QFEMLBR              | Percent Female Participation in Labor Force                                    |
| QFHH                 | Percent Female Headed Households                                               |
| QHISP                | Percent Hispanic                                                               |
| QHSEBRDN             | Percent Households Spending 30%+ Income on Housing Expenses                    |
| MEDAGE               | Median Age                                                                     |
| QMOHO                | Percent Mobile Homes                                                           |
| QNATAM               | Percent Native American                                                        |
| QNOAUTO              | Percent of Housing Units with No Car                                           |
| QNOHLTH              | Percent Without Health Insurance                                               |
| QNRRES               | Nursing Home Residents Per Capita                                              |
| PERCAP               | Per Capita Income                                                              |
| QPOVTY               | Percent Poverty                                                                |
| PPUNIT               | People per Unit                                                                |
| QRENTER              | Percent Renters                                                                |
| QRICH                | Percent Households Earning over \$200,000 annually                             |
| QSERV                | Percent Employment in Service Industry                                         |
| QSNGLPAR             | Percent Children Living in Single Parent Families                              |
| QSSBEN               | Percent Households Receiving Social Security Benefits                          |
| QUNOCCHU             | Percent Unoccupied Housing Units                                               |

**Table S2: BRIC Variables**

| <b>Social Resilience</b>                               |                                                                                                    |
|--------------------------------------------------------|----------------------------------------------------------------------------------------------------|
| <u>Variable</u>                                        | <u>Calculation</u>                                                                                 |
| Communication capacity                                 | % Households with telephone service available                                                      |
| Educational attainment                                 | % Population over 25 with college education or more                                                |
| English language competency                            | % Population proficient English speakers                                                           |
| Food provisioning capacity                             | Food security rate                                                                                 |
| Health insurance                                       | % Population under age 65 with health insurance                                                    |
| Mental health support                                  | Psychosocial support facilities per capita                                                         |
| Non-special needs                                      | % Population without sensory, physical, or mental disability                                       |
| Physician access                                       | Physicians per capita                                                                              |
| Pre-retirement age                                     | % Population between 15 to 65 years of age                                                         |
| Transportation Access                                  | % Households with at least one vehicle                                                             |
| <b>Economic Resilience</b>                             |                                                                                                    |
| <u>Variable</u>                                        | <u>Calculation</u>                                                                                 |
| Business size I                                        | Ratio of large to small businesses                                                                 |
| Business size II                                       | Ratio of employees to establishments                                                               |
| Employment rate                                        | % Labor force employed                                                                             |
| Energy burden                                          | Average Energy Burden (% income) (Inverted)                                                        |
| Federal employment                                     | % Labor force employed by federal government                                                       |
| Gender income equality                                 | % Absolute difference between male and female median income divided by annual income (Inverted)    |
| Homeownership                                          | % Owner-occupied housing units                                                                     |
| Large retail-regional/national geographic distribution | Large retail stores per capita                                                                     |
| Non-dependence on primary/tourism sectors              | % Employees not in farming, fishing, forestry, extractive industry, or tourism                     |
| Race/ethnicity income equality                         | Gini coefficient (Inverted)                                                                        |
| <b>Community Capital</b>                               |                                                                                                    |
| <u>Variable</u>                                        | <u>Calculation</u>                                                                                 |
| Place attachment-native born residents                 | % Population born in state of current residence                                                    |
| Place attachment-not recent immigrants                 | % Population not foreign-born persons who came to US within previous five years                    |
| Political engagement                                   | % Voting age population participating in recent election                                           |
| Social capital-civic organizations                     | # Civic organizations per capita                                                                   |
| Social capital-disaster volunteerism                   | # AmeriCorps volunteers per capita                                                                 |
| Social capital-religious organizations                 | # Religious organizations per capita                                                               |
| <b>Institutional Resilience</b>                        |                                                                                                    |
| <u>Variable</u>                                        | <u>Calculation</u>                                                                                 |
| Crop insurance coverage                                | Crop insurance policies per square mile                                                            |
| Disaster aid experience                                | # Presidential Disaster Declarations divided by # of loss-causing hazard events for 10-year period |
| Flood insurance coverage                               | % Housing units covered by National Flood Insurance Program                                        |
| Local disaster training                                | % Population in communities covered by Citizen Corps programs                                      |

|                                           |                                                                                                    |
|-------------------------------------------|----------------------------------------------------------------------------------------------------|
| Mitigation spending                       | Ten-year average per capita spending for mitigation projects                                       |
| Nuclear plant accident planning           | % Population within 10 miles of nuclear power plant                                                |
| Performance regimes-nearest metro area    | Distance from county seat to nearest county seat within a Metropolitan Statistical Area (Inverted) |
| Performance regimes-state capital         | Distance from county seat to state capital (Inverted)                                              |
| Political & jurisdictional fragmentation  | # Governments and special districts per 10,000 persons (Inverted)                                  |
| Population stability                      | Population change over previous five-year period (Inverted)                                        |
| <b>Housing/Infrastructural Resilience</b> |                                                                                                    |
| <u>Variable</u>                           | <u>Calculation</u>                                                                                 |
| Evacuation routes                         | Intersection density                                                                               |
| High-speed internet infrastructure        | % Population with access to broadband internet service                                             |
| Housing stock construction quality        | % Housing units built prior to 1970 or after 2000                                                  |
| Industrial re-supply potential            | Rail miles per square mile                                                                         |
| Medical care capacity                     | # Hospital beds per capita                                                                         |
| School restoration potential              | # Public schools per capita                                                                        |
| Sturdier housing types                    | % Housing units not mobile homes                                                                   |
| Temporary housing availability            | % Vacant housing units that are for rent                                                           |
| Temporary shelter availability            | # Hotels/motels per capita                                                                         |
| <b>Environmental Resilience</b>           |                                                                                                    |
| <u>Variable</u>                           | <u>Calculation</u>                                                                                 |
| Efficient energy use                      | Megawatt hours per energy consumer (Inverted)                                                      |
| Efficient water use                       | Water Supply Stress Index (Inverted)                                                               |
| Local food suppliers                      | Farms marketing products through Community Supported Agriculture per capita                        |
| Natural flood buffers                     | % Land in wetlands                                                                                 |
| Pervious surfaces                         | Average percent perviousness                                                                       |
